# Supplementary material for: Channelrhodopsin variants for high-rate optogenetic neurostimulation at low light intensities
Source: Springer Nature journal article supplement (doi:10.1038/s44321-025-00350-z), 2025-12-09
Supplement: MOESM1 [file 44321_2025_350_MOESM1_ESM.pdf › 44321_2025_350_MOESM1_ESM.pdf]

|                         | $J_{-60\text{mV}}$ (pA/pF)                                                             | $\tau_{\text{off}}$ (-60 mV)<br>RT                                                     |
|-------------------------|----------------------------------------------------------------------------------------|----------------------------------------------------------------------------------------|
| <b>Chronos (a)</b>      | 24.01 ± 7.46 (n = 14)<br># b***, c**, d(ns), e(ns), f(ns),<br>g(ns), h(ns), i(ns)      | 3.72 ± 0.67 (n = 10)<br>§ b(ns), c(ns), d(ns), e(ns), f*, g(ns),<br>h****, i****       |
| <b>f-Chronos (b)</b>    | 4.66 ± 2.98 (n = 13)<br># a***, c(ns), d(ns), e(ns), f(ns),<br>g****, h****, i***      | 1.72 ± 0.12 ms (n = 4)<br>§ a(ns), c(ns), d(ns), e(ns), f*, g(ns),<br>h****, i****     |
| <b>f-Chronos LC (c)</b> | 4.55 ± 3.09 (n = 9)<br># a**, b (ns), d(ns), e(ns), f(ns),<br>g****, h****, i***       | 3.56 ± 0.94 ms (n = 8)<br>§ a(ns), b(ns), d(ns), e(ns), f*, g(ns),<br>h****, i****     |
| <b>Chronos LC (d)</b>   | 17 ± 6.85 (n = 11)<br># a(ns), b(ns), (ns), e(ns), f(ns),<br>g(ns), h(ns), i(ns)       | 8.22 ± 1.73 ms (n = 11)<br>§ a(ns), b(ns), c(ns), e(ns), f(ns), g(ns),<br>h**, i*      |
| <b>ChR2 (e)</b>         | 19.33 ± 7.57 (n = 11)<br># a(ns), b(ns), c(ns), d(ns), f(ns),<br>g(ns), h(ns), i (ns)  | 10.54 ± 2.34 ms (n = 9)<br>§ a(ns), b(ns), c(ns), d(ns), f(ns), g(ns),<br>h(ns), i(ns) |
| <b>ChR2 ET/TC (f)</b>   | 14.15 ± 5.37 (n = 11)<br># a(ns), b(ns), c(ns), d(ns), e (ns),<br>g(ns), h**, i(ns)    | 10.99 ± 2.23 ms (n = 11)<br>§ a*, b*, c*, d(ns), e(ns), g(ns), h(ns), i(ns)            |
| <b>f-ChR2 TC (g)</b>    | 28.42 ± 10.36 (n = 16)<br># a (ns), b****, c****, d(ns), e(ns),<br>f(ns), h(ns), i(ns) | 9.73 ± 1 ms (n = 9)<br>§ a(ns), b(ns), c(ns), d(ns), e(ns), f(ns),<br>h(ns), i(ns)     |
| <b>CatCh (h)</b>        | 37.05 ± 12.46 (n = 11)<br># a(ns), b****, c****, d(ns), e(ns),<br>f**, g(ns), i(ns)    | 33.09 ± 5.72 ms (n = 9)<br>§ a****, b****, c****, d**, e(ns), f(ns),<br>g(ns), i (ns)  |
| <b>ChR2 TC (i)</b>      | 31.39 ± 17.53 (n = 10)<br># a(ns), b***, c***, d(ns), e(ns),<br>f(ns), g(ns), h(ns)    | 28.22 ± 6.52 ms (n = 10)<br># a****, b****, c****, d*, e(ns), f(ns),<br>g(ns), h(ns)   |

## Legend:

**Table EV1. Stationary current densities [ $J_{-60\text{mV}}$  (pA/pF)] and closing kinetics ( $\tau_{\text{off}}$  values) of blue light activated ChRs.** Stationary current densities were obtained from the quotient of the mean stationary photocurrent upon 500 ms light stimulation (saturating intensity of  $\sim 30 \text{ mW/mm}^2$ ,  $\lambda = 473 \text{ nm}$ ) and the capacitance of the cell. <sup>#</sup> Significantly different current densities compared to a) Chronos, b) f-Chronos, c) f-Chronos LC, d) Chronos LC, e) ChR2, f) ChR2 ET/TC, g) f-ChR2 TC, h) CatCh, and i) ChR2 TC. Closing kinetics were determined at RT by a monoexponential fit of the decaying photocurrent after 3 ms light pulse (saturating intensity of  $\sim 30 \text{ mW/mm}^2$ ,  $\lambda = 473 \text{ nm}$ ). f-Chronos closing kinetics at RT were obtained from photocurrents elicited by 7 ns light pulse ( $\lambda = 500 \text{ nm}$ ,  $1020 \text{ photons/m}^2$ ) to avoid interference in the off-kinetics due to shutter opening/closing time ( $\sim 700 \mu\text{s}$ ) using the Opolette 355 tunable laser system (Opotek Inc, Carlsbad, USA). <sup>§</sup> Significantly different closing kinetics compared to a) Chronos, b) f-Chronos, c) f-Chronos LC, d) Chronos LC, e) ChR2, f) ChR2 ET/TC, g) f-ChR2 TC, h) CatCh, and i) ChR2 TC. Kruskal-Wallis followed by Dunn's test:  $p > 0.05$  (ns); \*  $p < 0.05$ ; \*\*  $p < 0.01$ ; \*\*\*  $p < 0.001$ ; \*\*\*\*  $p < 0.0001$ . All measurements were performed in NG108-15 cells transiently transfected with the specified ChR variants by whole-cell patch clamp at membrane potential of  $-60 \text{ mV}$ . Data are
