# Supplementary material for: Channelrhodopsin variants for high-rate optogenetic neurostimulation at low light intensities
Source: Springer Nature journal article supplement (doi:10.1038/s44321-025-00350-z), 2025-12-09
Supplement: MOESM2 [file 44321_2025_350_MOESM2_ESM.pdf › 44321_2025_350_MOESM2_ESM.pdf]

|                         | $\tau_{\text{off}} (-60 \text{ mV})$<br>RT | $\tau_{\text{off}} (-60 \text{ mV})$<br>33 to 34 °C          | EC50 (mW/mm <sup>2</sup> )                                                   | Desensitization<br>(Stat/Peak)                                                          |
|-------------------------|--------------------------------------------|--------------------------------------------------------------|------------------------------------------------------------------------------|-----------------------------------------------------------------------------------------|
| <b>Chronos (a)</b>      | 3.72 ± 0.67<br>(n = 10)                    | 1.875 ± 0.47 ms<br>(n = 6)<br>§ b(ns), d(ns),<br>g(ns), h**  | 1.25 ± 0.64 (n = 6)<br>\$ b(ns), d(ns),<br>e(ns), f(ns), g(ns),<br>h(ns)     | 0.35 ± 0.085 (n = 10)<br># b****, c(ns),<br>d****, e(ns), f(ns),<br>g(ns), h****, i(ns) |
| <b>f-Chronos (b)</b>    | 1.72 ± 0.12 ms<br>(n = 4)                  | 0.80 ± 0.099 ms<br>(n = 4)<br>§ a(ns), d(ns), g*,<br>h***    | 5.12 ± 0.91 (n = 6)<br>\$ a(ns), d(ns),<br>e(ns), f(ns), g(ns),<br>h**       | 0.19 ± 0.044 (n = 14)<br># a****, c(ns),<br>d****, e(ns), f*,<br>g****, h****, i(ns)    |
| <b>f-Chronos LC (c)</b> | 3.56 ± 0.94 ms<br>(n = 8)                  |                                                              |                                                                              | 0.29 ± 0.026 (n = 3)<br># a(ns), b(ns), d****,<br>e(ns), f(ns), g(ns),<br>h****, i(ns)  |
| <b>Chronos LC (d)</b>   | 8.22 ± 1.73 ms<br>(n = 11)                 | 3.93 ± 0.19 ms<br>(n = 4)<br>§ a(ns), b(ns),<br>g(ns), h(ns) | 1.02 ± 0.14 (n = 4)<br>\$ a(ns), b(ns),<br>e(ns), f(ns), g(ns),<br>h(ns)     | 0.62 ± 0.077 (n = 6)<br># a****, b****,<br>c****, e****, f****,<br>g****, h(ns), i****  |
| <b>ChR2 (e)</b>         | 10.54 ± 2.34 ms<br>(n = 9)                 |                                                              | 1.29 ± 0.57 (n = 3)<br>\$ a(ns), b(ns),<br>d(ns), f(ns), g(ns),<br>h(ns)     | 0.26 ± 0.064 (n = 6)<br># a(ns), b(ns), c(ns),<br>d****, f(ns), g(ns),<br>h****, i(ns)  |
| <b>ChR2 ET/TC (f)</b>   | 10.99 ± 2.23 ms<br>(n = 11)                |                                                              | 1.7 ± 0.33 (n = 3)<br>\$ a(ns), b(ns),<br>d(ns), e(ns), g(ns),<br>h(ns)      | 0.298 ± 0.063 (n = 9)<br># a(ns), b*, c(ns),<br>d****, e(ns), g(ns),<br>h****, i(ns)    |
| <b>f-ChR2 TC (g)</b>    | 9.73 ± 1 ms<br>(n = 9)                     | 4.1 ± 0.96 ms<br>(n = 12)<br>§ a**, b****, d(ns),<br>h(ns)   | 1.29 ± 0.315<br>(n = 3)<br>\$ a(ns), b(ns),<br>d(ns), e(ns), f(ns),<br>h(ns) | 0.37 ± 0.073 (n = 7)<br># a(ns), b****, c(ns),<br>d****, e(ns), f(ns),<br>h****, i(ns)  |
| <b>CatCh (h)</b>        | 33.09 ± 5.72 ms<br>(n = 9)                 | 15.71 ± 2.17 ms<br>(n = 5)                                   | 0.54 ± 0.12 (n = 3)                                                          | 0.74 ± 0.058 (n = 8)                                                                    |

|             |                              |                                                |                                                                                            |
|-------------|------------------------------|------------------------------------------------|--------------------------------------------------------------------------------------------|
|             | § a**, b***, d(ns),<br>g(ns) | § a(ns), b**,<br>d(ns), e(ns), f(ns),<br>g(ns) | # a****, b****,<br>c****, d(ns), e****,<br>f****, g****, i****                             |
| ChR2 TC (i) | 28.22 ± 6.52 ms<br>(n = 10)  | 0.637 (n = 1)                                  | 0.28 ± 0.079 (n = 6)<br><br># a(ns), b(ns), c(ns),<br>d****, e(ns), f(ns),<br>g(ns), i**** |

## Legend:

**Table EV2. Closing kinetics ( $\tau_{\text{off}}$  values), EC50 values and stationary-peak-ratios of blue light activated ChRs.** Closing kinetics were determined at RT by a monoexponential fit of the decaying photocurrent after 3 ms light pulse (saturating intensity of 30 to 40 mW/mm<sup>2</sup>,  $\lambda$  = 473 nm), and f-Chronos closing kinetics were obtained from photocurrents elicited by 7 ns light pulse ( $\lambda$  = 500 nm, 1,020 photons/m<sup>2</sup>), or more physiological temperature (33 to 34 °C; 1 ms, saturating intensity of 30 to 40 mW/mm<sup>2</sup>,  $\lambda$  = 488 nm). The half maximal activation value (effective power density for 50 % activation, analogous to an EC<sub>50</sub>) was determined by hyperbolic fitting of the stationary photocurrent amplitude obtained upon 0.5 or 1 s light pulses at different irradiances (mW/mm<sup>2</sup>). Desensitization values were determined by the quotient of the mean stationary photocurrent of 0.5 to 1 s light pulse and their respective peak photocurrent. All measurements were performed in NG108-15 cells transiently transfected with the specified ChR variants by whole-cell patch clamp at membrane potential of -60 mV. Data are presented as mean  $\pm$  SD. All values are derived from the data shown in Figure 1. § Significantly different closing kinetics compared to a) Chronos, b) f-Chronos, d) Chronos LC, g) f-ChR2 TC, and h) CatCh. \$ Significantly different EC50 compared to a) Chronos, b) f-Chronos, d) Chronos LC, e) ChR2, f) ChR2 ET/TC, g) f-ChR2 TC, and h) CatCh. # Significantly different desensitization to a) Chronos, b) f-Chronos, c) f-Chronos LC, d) Chronos LC, e) ChR2, f) ChR2 ET/TC, g) f-ChR2 TC, h) CatCh, and i) ChR2 TC.  $\tau_{\text{off}}$  (-60 mV; at 33 to 34 °C) and EC50 were tested by Kruskal-Wallis t-test and post-hoc Dunn's test: p > 0.05 (ns); \* p < 0.05; \*\* p < 0.01; \*\*\* p < 0.001; \*\*\*\* p < 0.0001. Desensitization was tested by ANOVA Bonferroni: p
