# Supplementary material for: Channelrhodopsin variants for high-rate optogenetic neurostimulation at low light intensities
Source: Springer Nature journal article supplement (doi:10.1038/s44321-025-00350-z), 2025-12-09
Supplement: MOESM13 [file 44321_2025_350_MOESM13_ESM.pdf › 44321_2025_350_MOESM13_ESM.pdf]

## Expanded View Figures

**Figure EV1. Photocurrent measurements of blue light-activated ChRs at physiological temperature.**

(A) Exemplary peak-normalized photocurrents from whole-cell patch-clamp measurements at  $-34^{\circ}\text{C}$  in NG108-15 cells. ChRs were activated by 50 light pulses of 1 ms at 488 nm ( $\sim 40\text{ mW/mm}^2$ ) at different frequencies (5, 50, 125, and 500 Hz). The lower panels are magnifications of the 500 Hz traces showing photocurrent fluctuations at the stationary state. (B) Dependence of the stationary/peak ratio on light pulse frequency. Error bars depict SD. (C) Quantification of photocurrent fluctuations normalized to the stationary current amplitude. In panels (B, C): CatCh:  $n = 5$ , f-Chronos:  $n = 3$ , Chronos LC:  $n = 3$ , f-ChR2 TC:  $n = 4$ . Error bars depict SD. Statistical comparisons can be found in Table EV3. (D) Exemplary peak normalized photocurrents measured in NG cells expressing f-Chronos, Chronos, f-ChR2 TC, or CatCh showing the relation between photocurrent decay kinetics and the transferred charge (area under the curve shown in yellow).

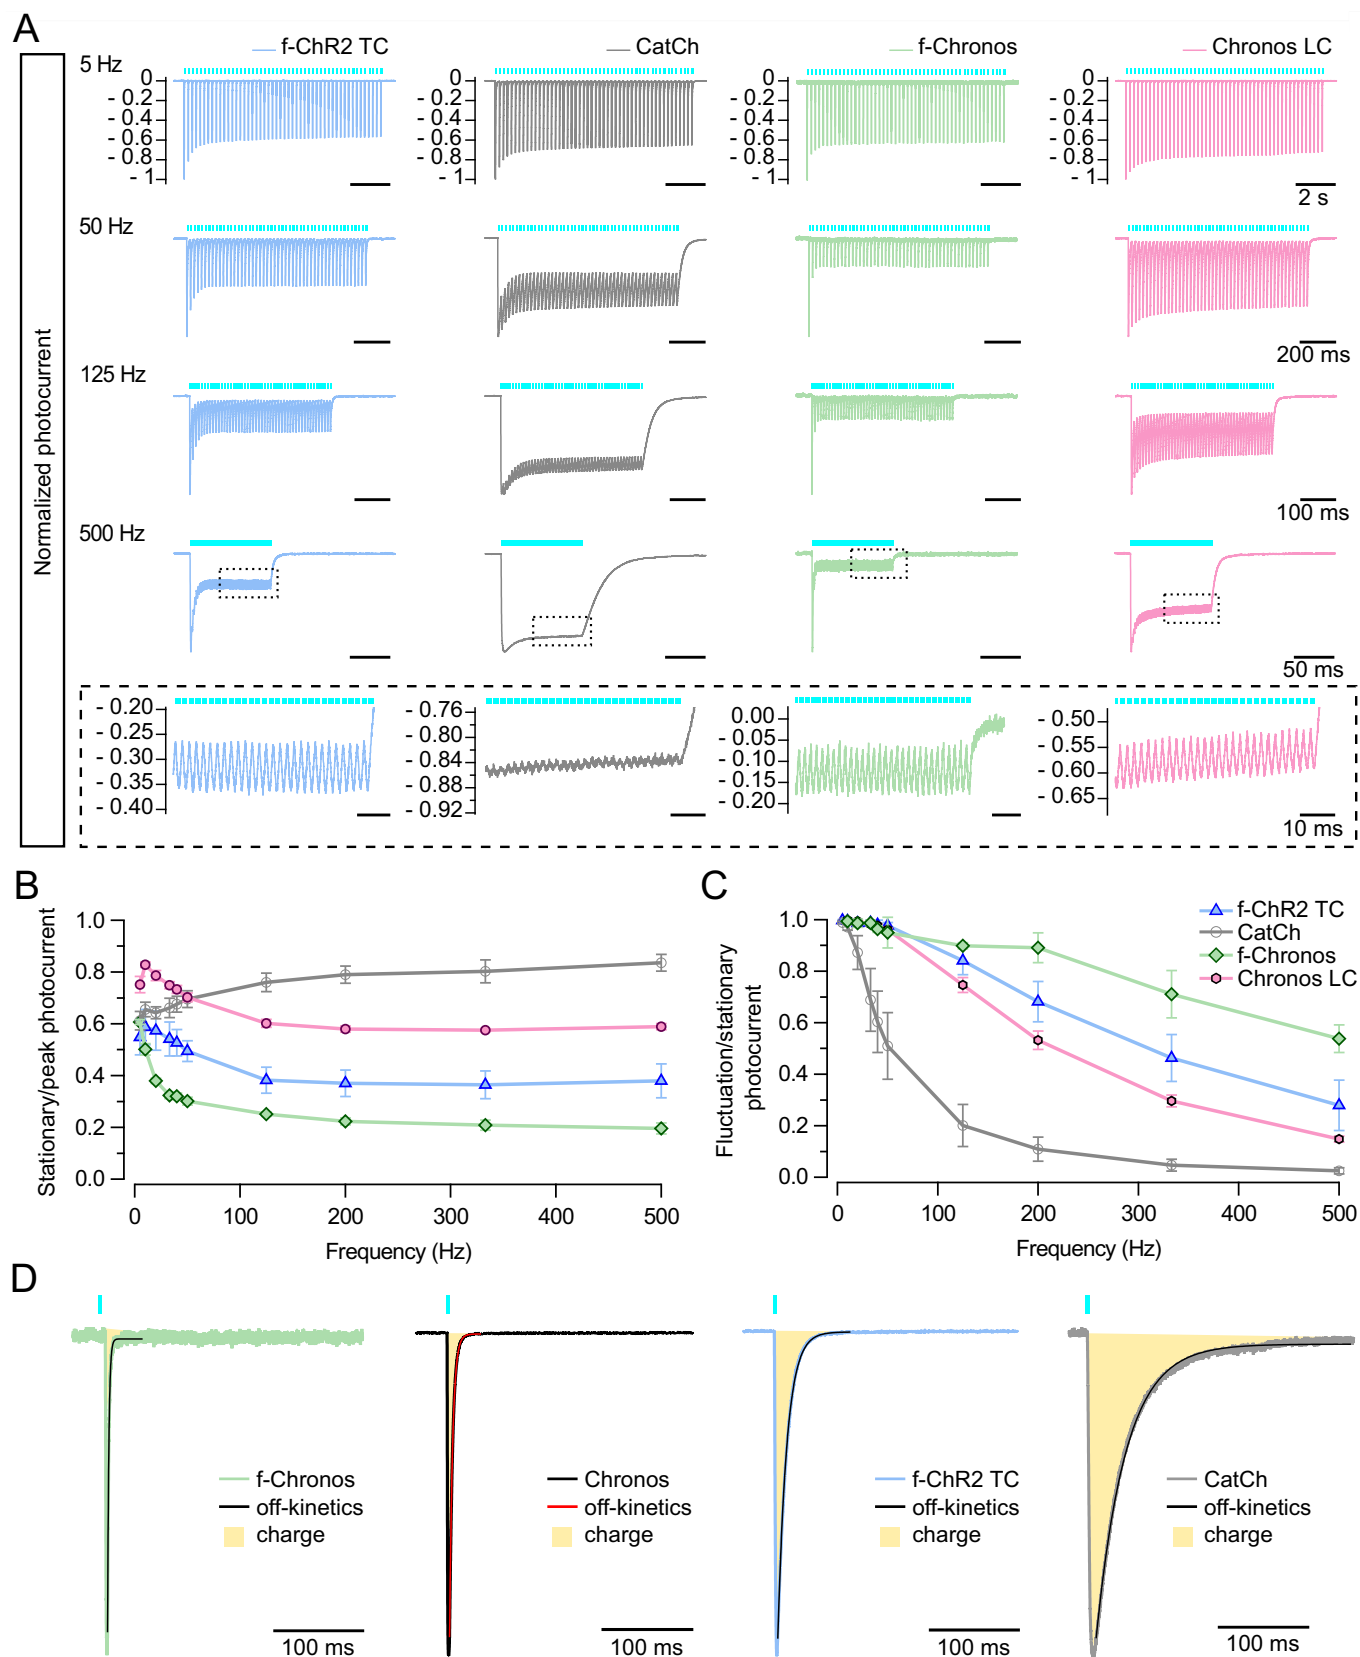

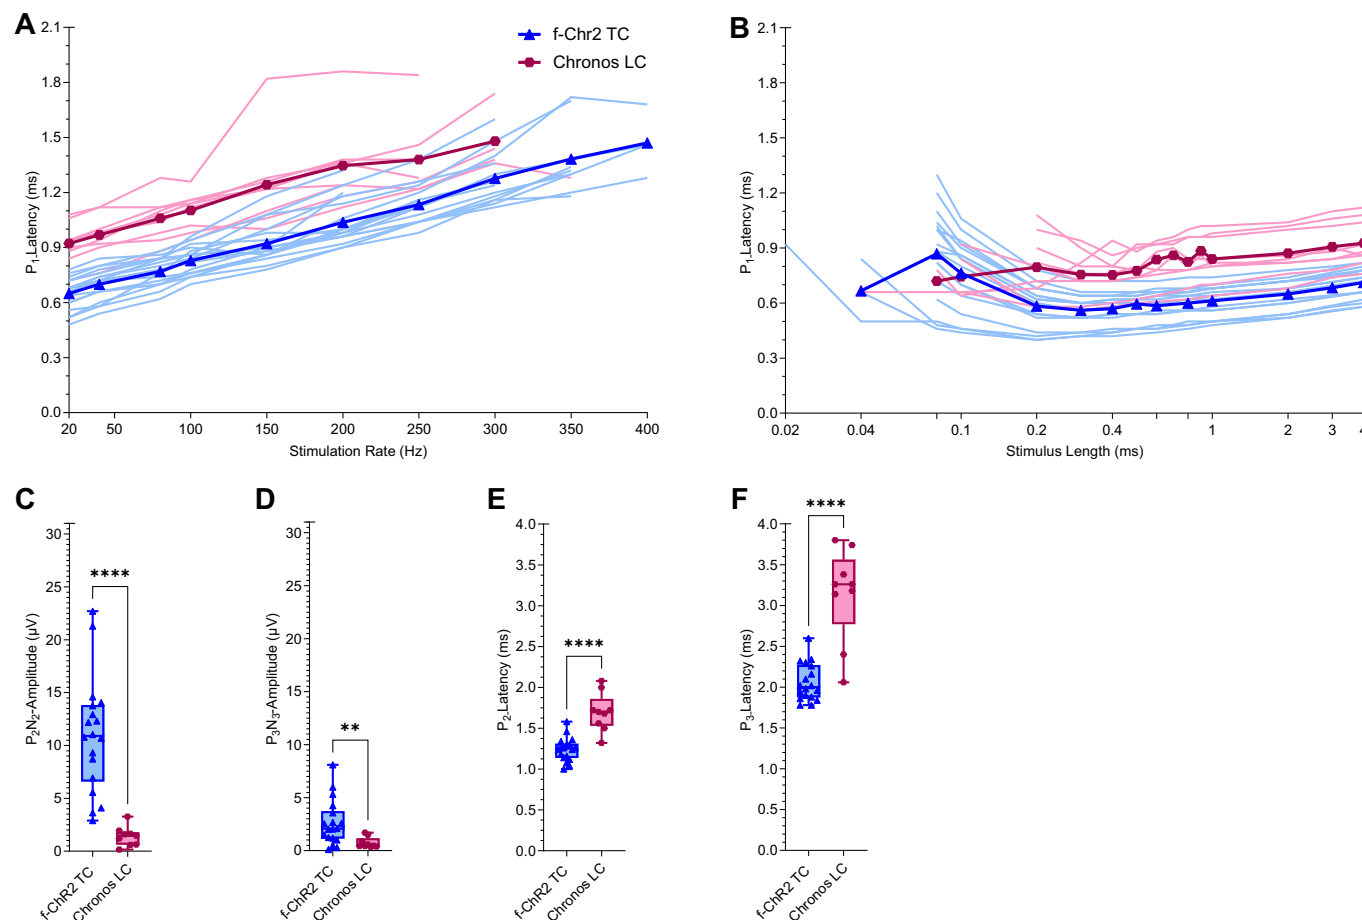

**Figure EV2. Analysis of auditory pathway activity evoked by photostimulation of SGNs expressing optimized blue-light-sensitive ChRs.**

(A) P1 latency of oABRs at varying repetition rate using 1 ms pulses at -38 to 45.6 mW (bold: mean; faint: all measurements),  $n = 18$  mice for f-ChR2 TC,  $n = 9$  mice for Chronos LC. (B) P1 latency of oABRs for varying pulse durations using -38 to 45.6 mW pulses at 10 Hz (bold: mean; faint: all measurements) for  $n = 17$  mice for f-ChR2 TC,  $n = 9$  mice for Chronos LC. (C-F) P<sub>2</sub>-N<sub>2</sub>, P<sub>3</sub>-N<sub>3</sub> amplitudes and P<sub>2</sub>, P<sub>3</sub> latencies of oABRs for  $n = 18$  mice for f-ChR2 TC,  $n = 9$  mice for Chronos LC depicting activation of the auditory pathway using -38 to 45.6 mW, 1 ms pulses at 10 Hz. Data were analyzed as mean  $\pm$  SD. Center lines represent median values. Boxes show the 25<sup>th</sup> and 75<sup>th</sup> percentile and error bars depict minima and maxima. \*\*\*\* $p = 8.53 \times 10^{-7}$  (C),  $p = 1.09 \times 10^{-5}$  (E),  $p = 2.62 \times 10^{-5}$  (F); \*\* $p = 0.0075$  by two-tailed Mann-Whitney test.

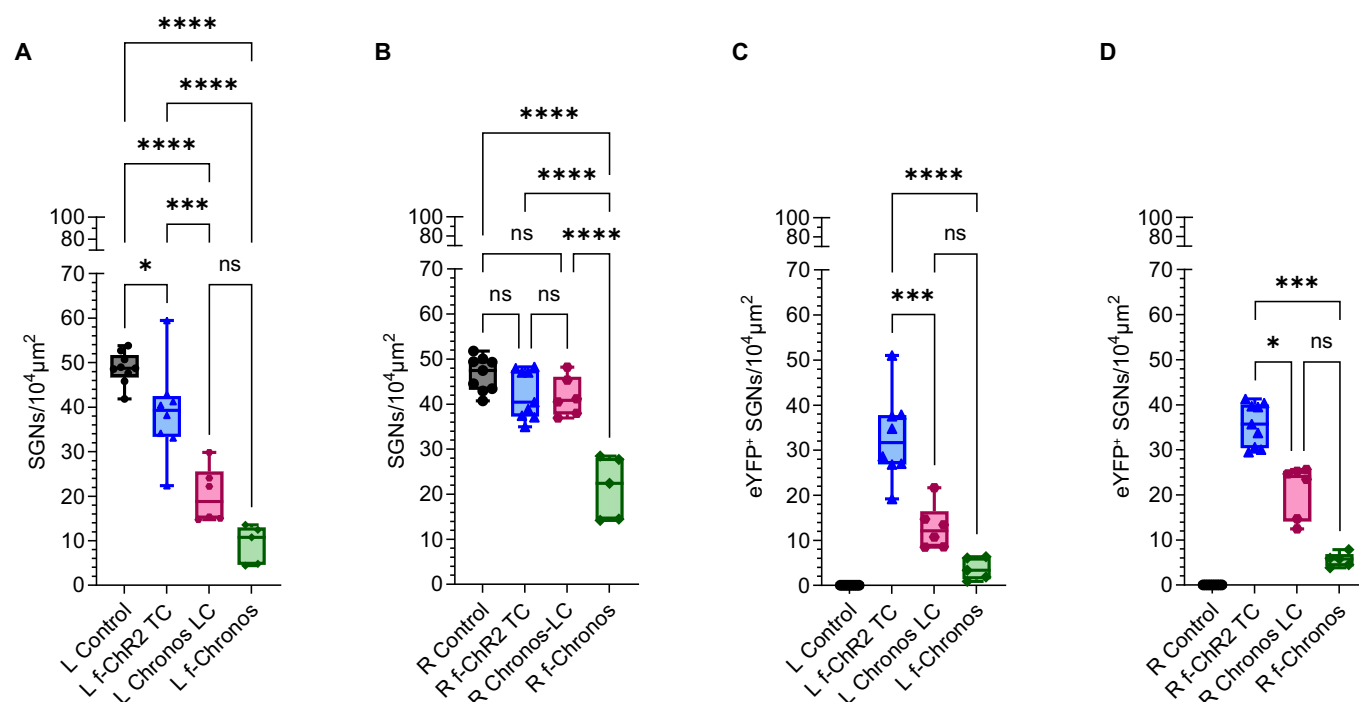

**Figure EV3. Immunohistochemical quantification of SGNs expressing optimized blue-light sensitive ChRs.**

(A–D) Box plots show statistics for the SGN density of left (injected, A) and right (non-injected, B) cochleae across all cochlear turns, as well as for the density of ChR-expressing (EYFP-positive) cells for the left (C) and the right (D) side. Quantification includes f-ChR2 TC (blue;  $n = 8$  for the left and  $n = 9$  for the right cochleae), Chronos LC (violet;  $n = 6$  for left and right cochlea), f-Chronos (green;  $n = 5$  for left and right cochlea), and non-treated wild-type cochleae (black;  $n = 9$  cochlea for both sides each). Center lines represent median values. Boxes show the 25<sup>th</sup> and 75<sup>th</sup> percentile and error bars depict minima and maxima. \*\*\*\* $p = 2.68 \times 10^{-7}$  (A: L Control vs L Chronos LC),  $p = 1.74 \times 10^{-9}$  (A: L Control vs. L f-Chronos),  $p = 5.00 \times 10^{-7}$  (A: f-ChR2 TC vs. L f-Chronos),  $p = 1.68 \times 10^{-8}$  (B: R Control vs. R f-Chronos),  $p = 6.14 \times 10^{-7}$  (B: R f-ChR2 TC vs. R f-Chronos),  $p = 3.53 \times 10^{-6}$  (B: R Chronos LC vs. R f-Chronos),  $p = 6.06 \times 10^{-6}$  (C: L f-ChR2 TC vs. L f-Chronos); \*\*\* $p = 0.0002$  (A),  $p = 0.0003$  (C),  $p = 0.0002$  (D); \* $p = 0.0458$  (A),  $p = 0.0485$  (D) by ordinary one-way ANOVA corrected with Bonferroni's (A–C) and Kruskal-Wallis test corrected for multiple comparison with Dunn's (D).

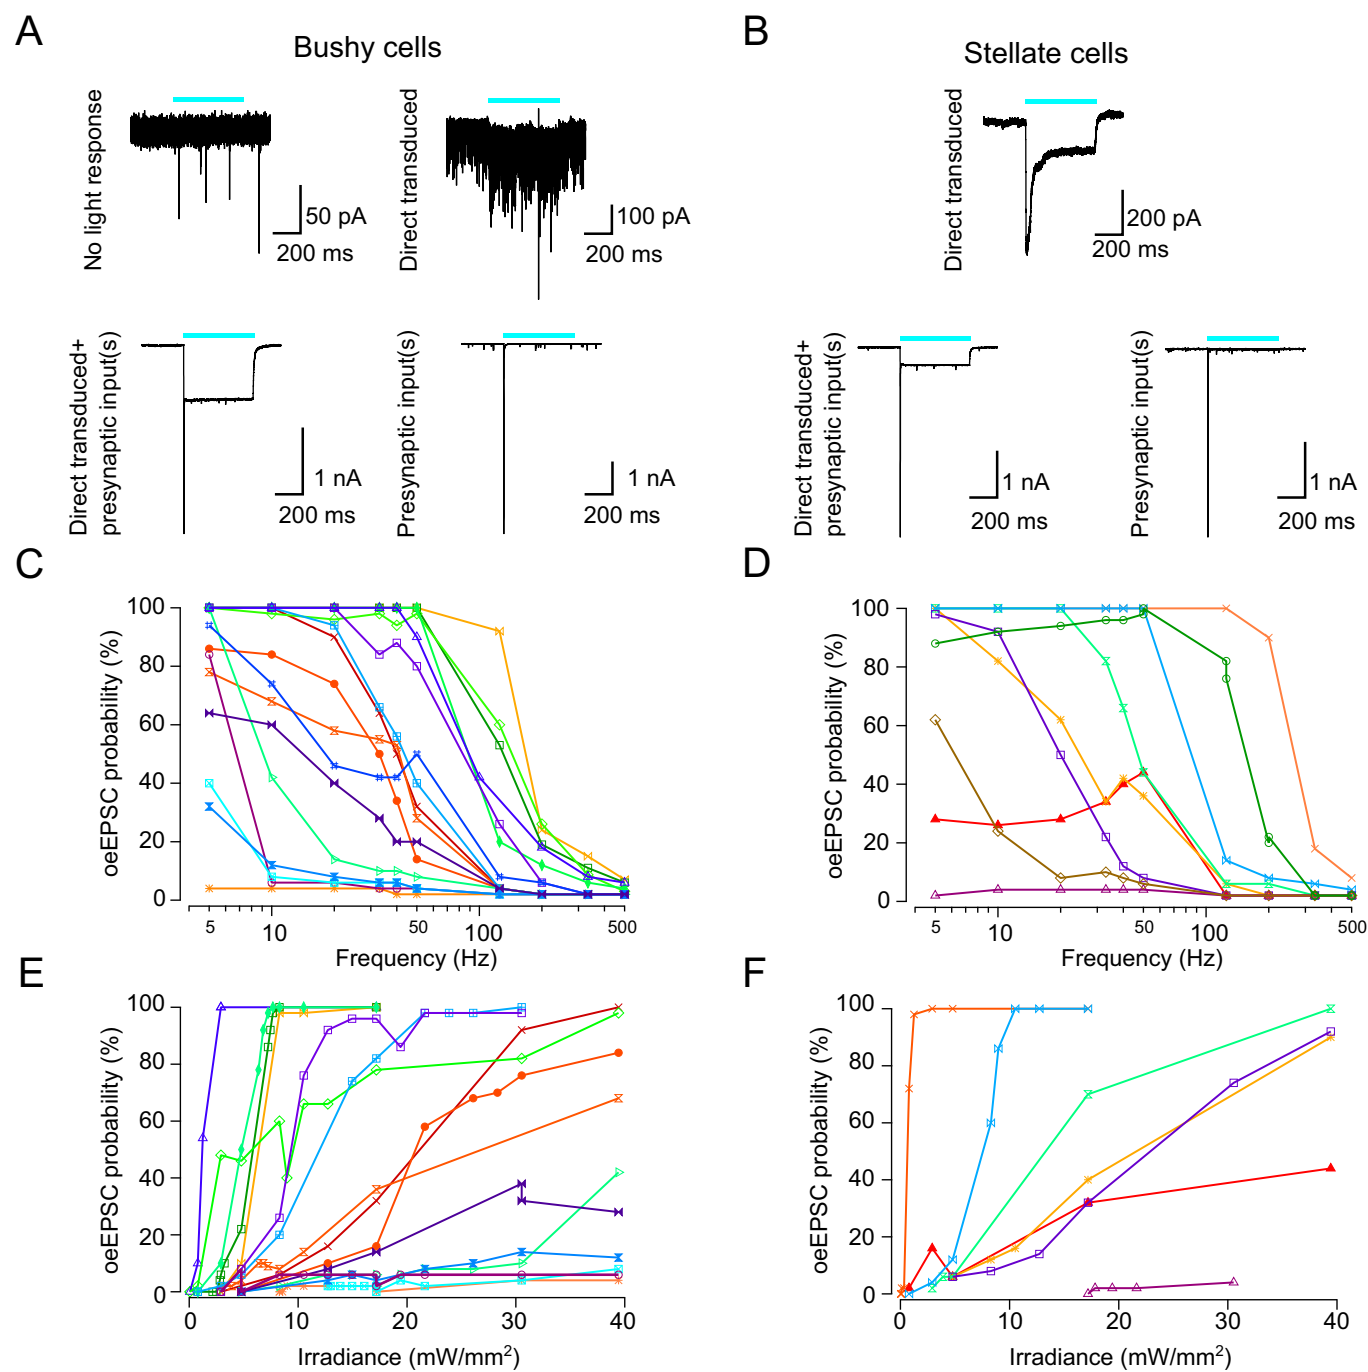

**Figure EV4. Variability of photoresponses in principal cells of the AVCN.**

(A, B), Recordings upon long light stimulation (500 ms, 488 nm, ~40 mW/mm<sup>2</sup>) of either bushy (A) or stellate (B) cells, indicating transduced principal cells (directly transduced) and non-transduced SGNs, a combination of directly transduced principal cells + transduced SGN presynaptic inputs), or none of them (no light response). Dependence of oeEPSC probability on the stimulation frequency ((C), for bushy cells; (D), for stellate cells) and the irradiance ((E), for bushy cells; (F), for stellate cells) in principal cells only receiving presynaptic input(s).
